# Supplementary material
Source: MDPI journal article supplement (https://www.mdpi.com/2073-4344/14/1/87)
Supplement: s1 [file s1]

## Supporting Information

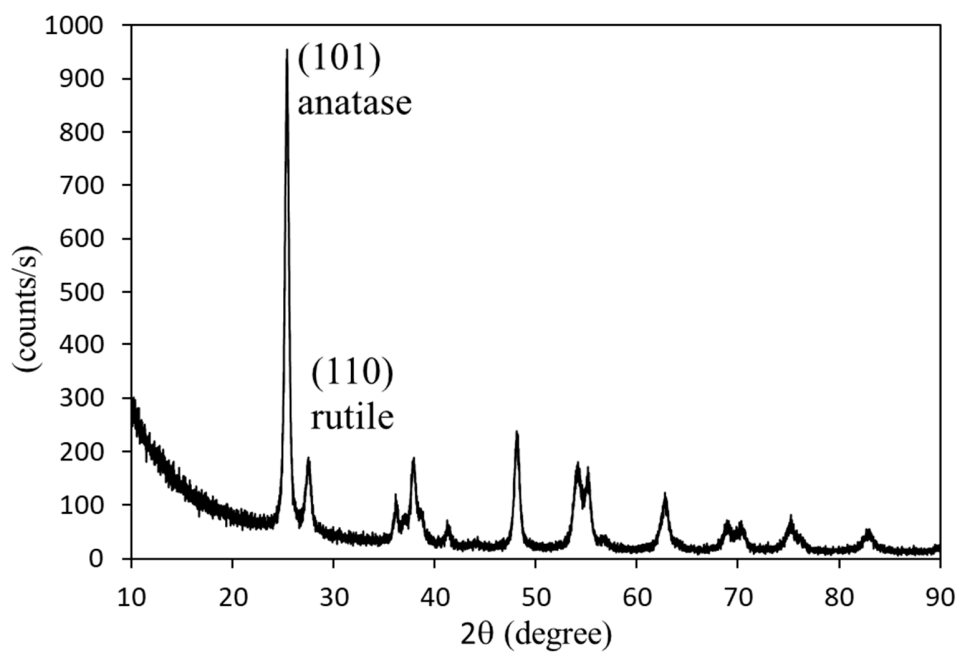

Figure S1. XRD of TiO<sub>2</sub> (anatase + rutile), the rutile content is 15 wt. %.

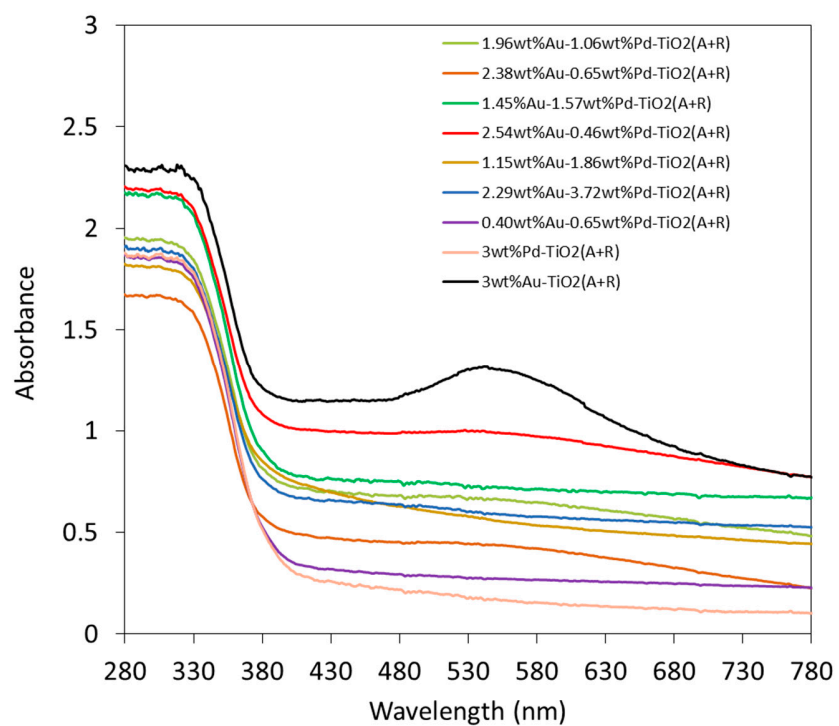

Figure S2. UV-Vis spectra of the series of catalysts studied.

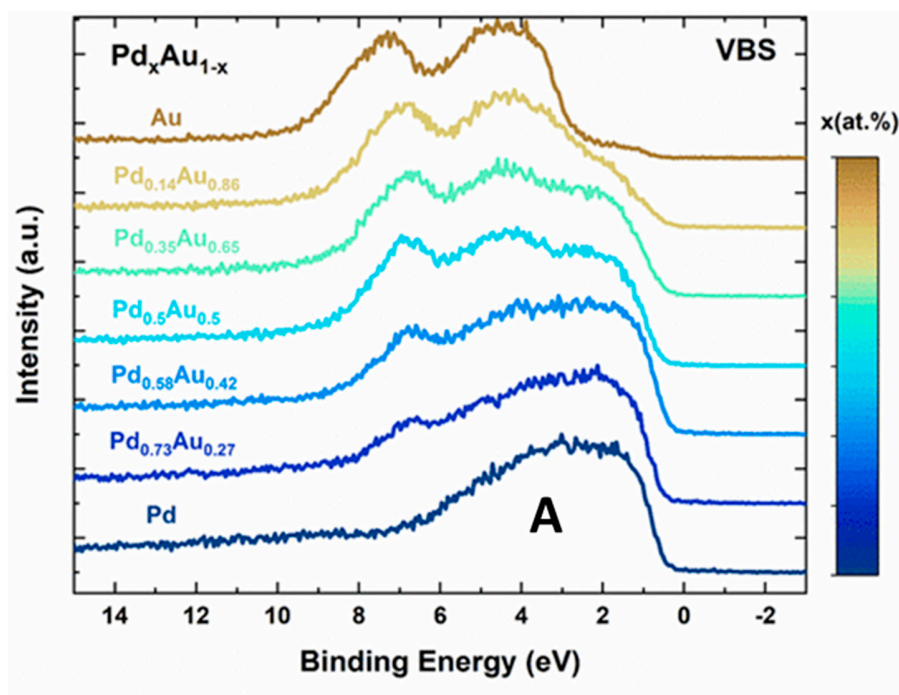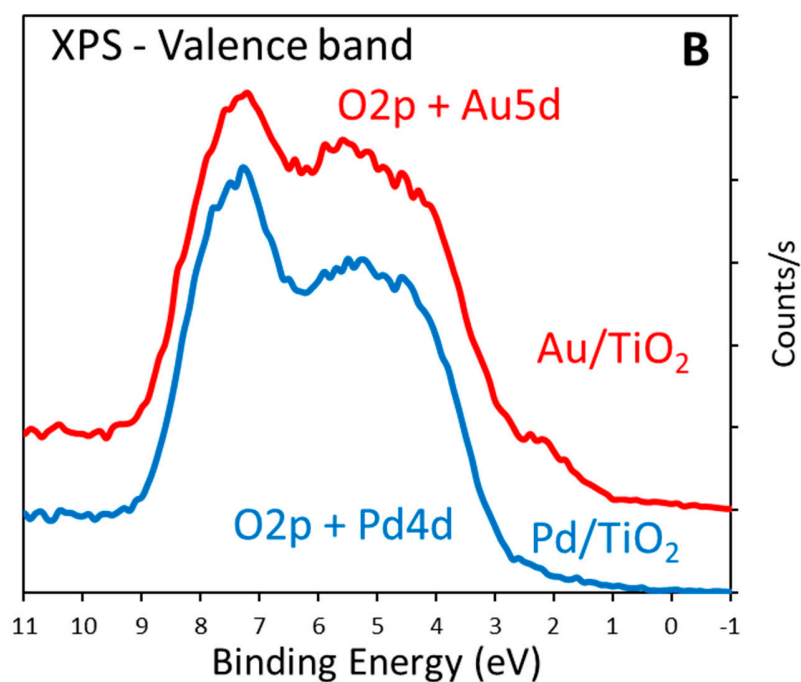

Figure S3. (A)Valence band XPS of Pd, Au and Pd-Au alloy series, from ref. 24 (printed with permission); (B) Valence band XPS of 3 wt. % Pd/TiO<sub>2</sub> and 3 wt. % Au/TiO<sub>2</sub>.

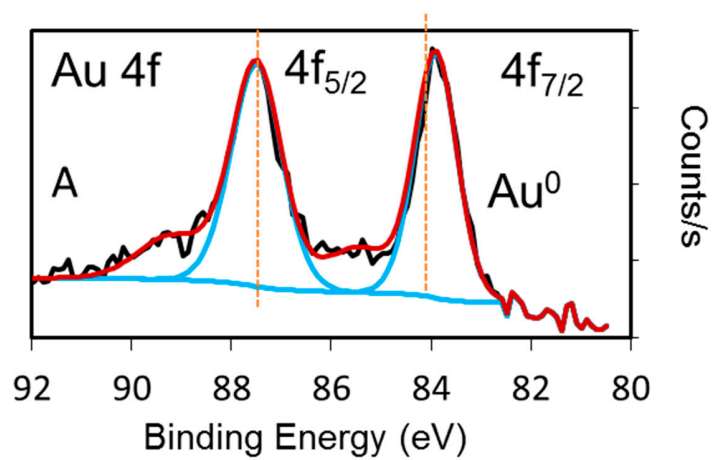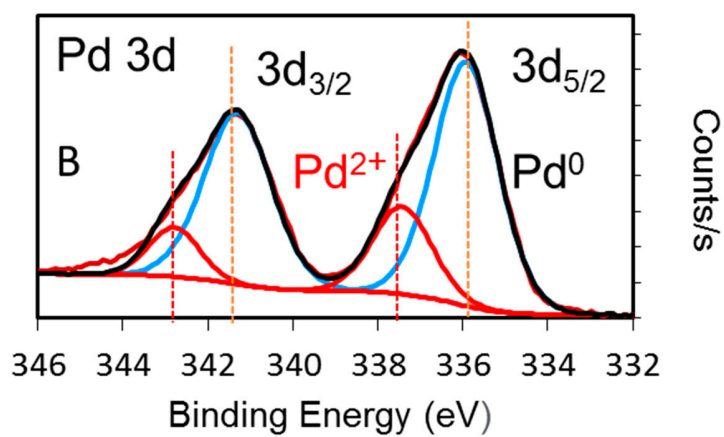

Figure S4. XPS Au 4f (A) and XPS Pd 3d (B) of as prepared 1.22 wt. % Au – 1.97 wt. % Pd / TiO<sub>2</sub> (anatase + rutile).

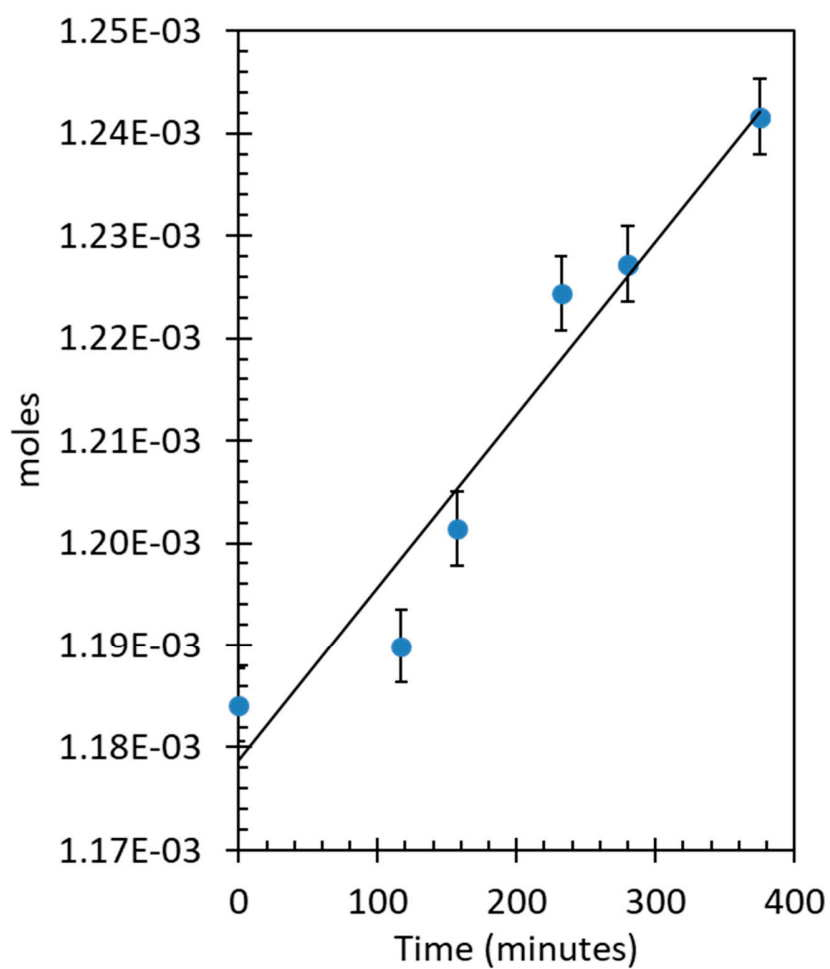

Figure S5.  $O_2$  evolution reaction over 40 mg of same catalyst in A with 1000 mg of  $Ce(SO_4)_2$  (0.15M) using 40 mg of catalyst.

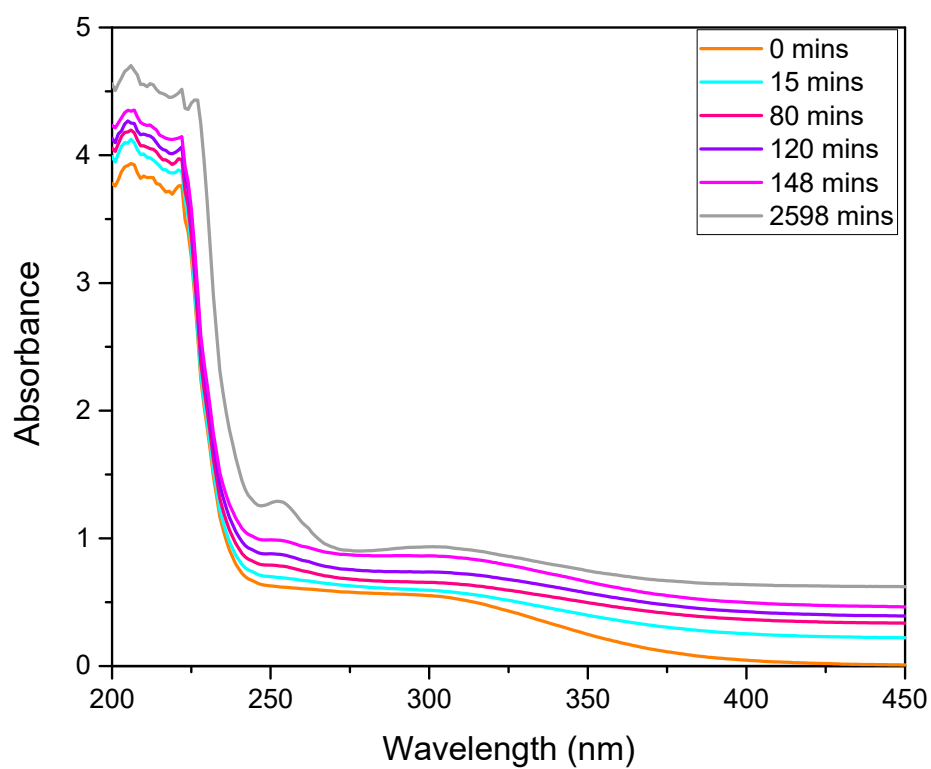

Figure S6. UV-Vis absorption spectra were obtained at different intervals of time after the addition of catalyst  $\text{IrO}_2 / \text{TiO}_2$  (anatase) in 0.18 M CAN. Spectra were obtained by diluting the concentration of the mixture to  $2.74 \times 10^{-4}$  M (Ce concentration).

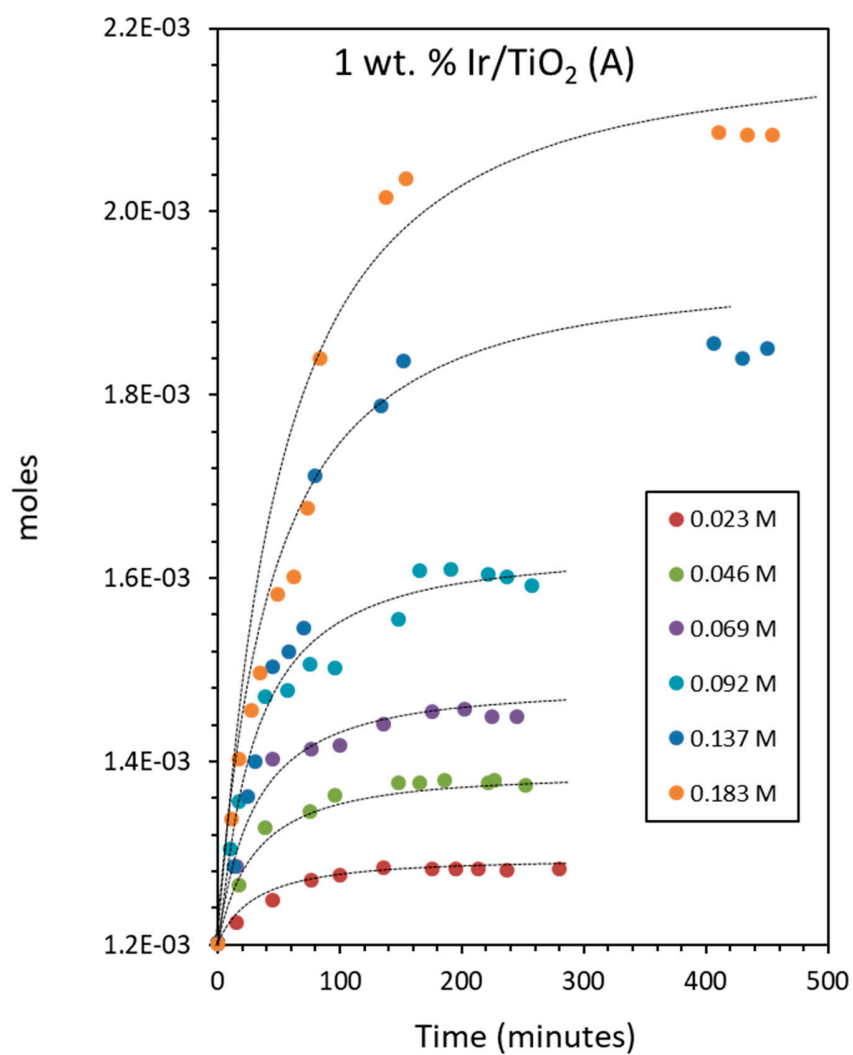

Figure S7. O<sub>2</sub> evolution reaction over 1 wt.% IrO<sub>2</sub> / TiO<sub>2</sub> (anatase) using 20 mg of catalyst, the concentration of CAN ranges from 0.0456-0.184 M (500-2000 mg) in 20 mL of water for prolonged periods. The lines are a guide to the eyes.

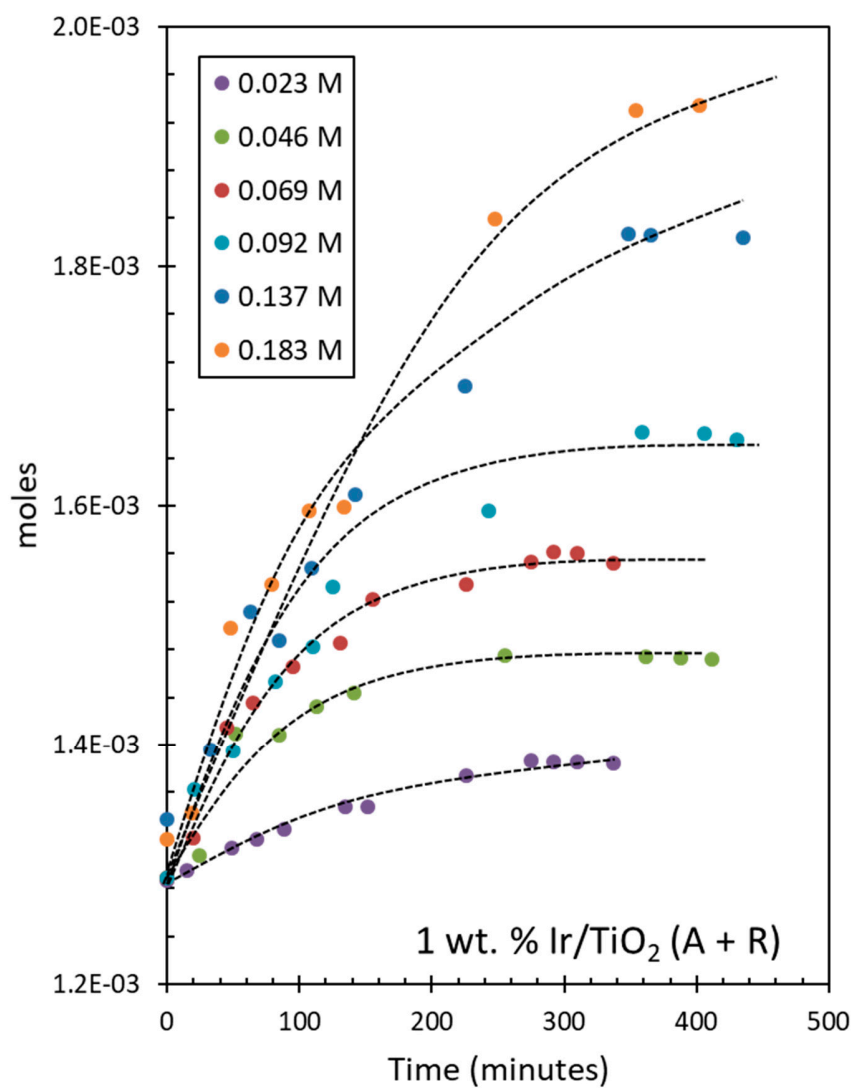

Figure S8. O<sub>2</sub> evolution reaction over 1 wt.% IrO<sub>2</sub> / TiO<sub>2</sub> (anatase + rutile) using 20 mg of catalyst, the concentration of CAN ranges from 0.023-0.184 M (250-2000 mg) in 20 mL of water for prolonged periods. The lines are a guide to the eyes.

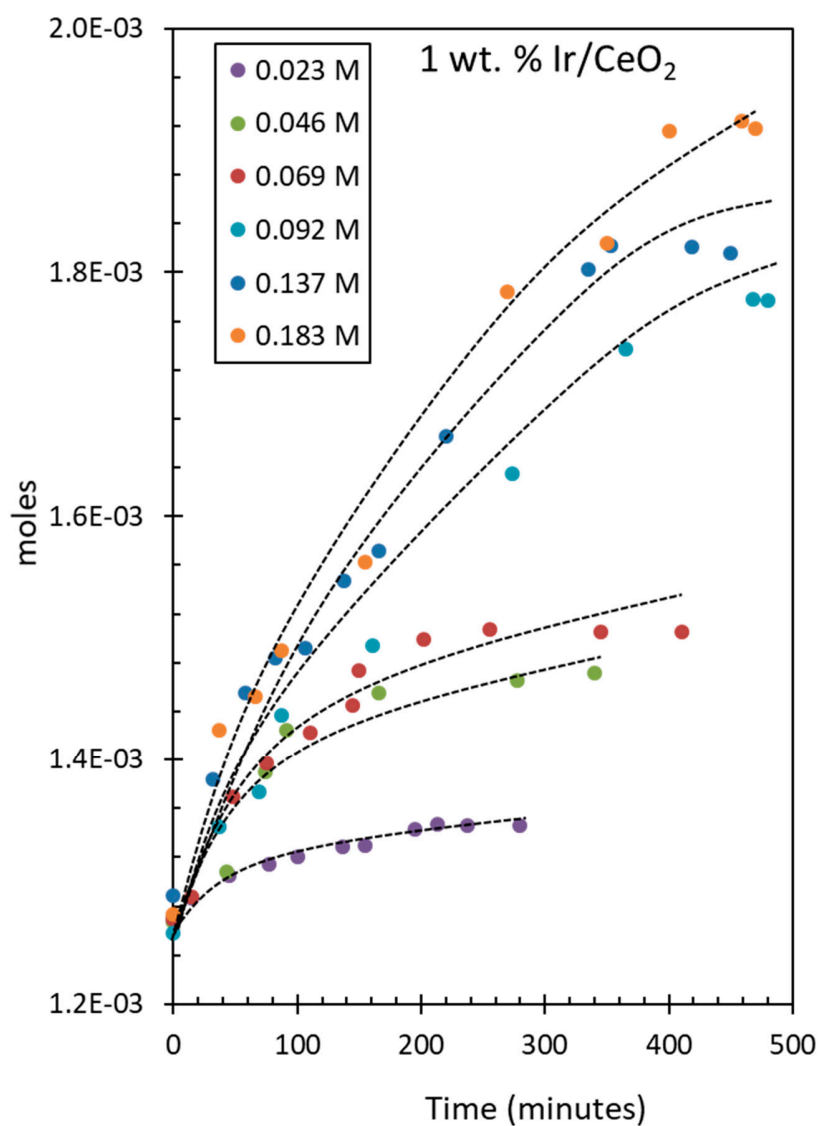

Figure S9. O<sub>2</sub> evolution reaction over 1 wt. %-IrO<sub>2</sub> / CeO<sub>2</sub> using 20 mg of catalyst, the concentration of CAN ranges from 0.023-0.184 M (250-2000mg) in 20 mL of water for prolonged periods. The lines are a guide to the eyes.

Table S1. Example for the calculation of TONs and TOFs for a Au-Pd catalyst with different CAN concentrations.

Catalyst: 1.45 wt. % Au – 1.57 wt. % Pd / TiO<sub>2</sub> (anatase + rutile). TONs are calculated after 400 minutes. TOFs are calculated from the linear part of the O<sub>2</sub> production (up 150 minutes).

| CAN weight (mg) | O <sub>2</sub> (moles) | catalyst weight (g) | Au weight (g) | moles of Au           | Pd weight (g) | moles of Pd           | TON<br>moles of O <sub>2</sub> / moles of metal | Rate, moles O <sub>2</sub> /min | TOF (min <sup>-1</sup> )<br>Rates/moles (Au +Pd) |
|-----------------|------------------------|---------------------|---------------|-----------------------|---------------|-----------------------|-------------------------------------------------|---------------------------------|--------------------------------------------------|
| 250             | 5.76 10 <sup>-5</sup>  | 0.02                | 0.00029       | 1.47 10 <sup>-6</sup> | 0.000314      | 2.95 10 <sup>-6</sup> | 13.02                                           | 2.89 10 <sup>-7</sup>           | 0.07                                             |
| 500             | 9.38 10 <sup>-5</sup>  | 0.02                | 0.00029       | 1.47 10 <sup>-6</sup> | 0.000314      | 2.95 10 <sup>-6</sup> | 21.20                                           | 6.32 10 <sup>-7</sup>           | 0.14                                             |
| 750             | 1.67 10 <sup>-4</sup>  | 0.02                | 0.00029       | 1.47 10 <sup>-6</sup> | 0.000314      | 2.95 10 <sup>-6</sup> | 37.75                                           | 6.96 10 <sup>-7</sup>           | 0.16                                             |
| 1000            | 3.17 10 <sup>-4</sup>  | 0.02                | 0.00029       | 1.47 10 <sup>-6</sup> | 0.000314      | 2.95 10 <sup>-6</sup> | 71.77                                           | 7.32 10 <sup>-7</sup>           | 0.17                                             |
| 1500            | 4.77 10 <sup>-4</sup>  | 0.02                | 0.00029       | 1.47 10 <sup>-6</sup> | 0.000314      | 2.95 10 <sup>-6</sup> | 107.81                                          | 1.49 10 <sup>-7</sup>           | 0.34                                             |
| 2000            | 5.37 10 <sup>-4</sup>  | 0.02                | 0.00029       | 1.47 10 <sup>-6</sup> | 0.000314      | 2.95 10 <sup>-6</sup> | 121.33                                          | 1.57 10 <sup>-7</sup>           | 0.35                                             |
| 5000            | 1.99 10 <sup>-4</sup>  | 0.02                | 0.00029       | 1.47 10 <sup>-6</sup> | 0.000314      | 2.95 10 <sup>-6</sup> | 450.10                                          |                                 |                                                  |
